# Supplementary material for: The number of dissected lymph nodes contributes to good prognosis after robot-assisted radical cystectomy for muscle-invasive bladder cancer without lymph node metastasis at clinical staging
Source: Research Square preprint supplement (doi:10.21203/rs.3.rs-8551382/v1), 2026-01-29
Supplement: Supplementary file 1 [file 61f02377ca449307e3c3bebd.docx]

|  | All grade (%) | | | Grade ≤2 (%) | | | Grade ≥3 (%) | | |
| --- | --- | --- | --- | --- | --- | --- | --- | --- | --- |
| LNs <20 | LNs ≥20 | P value | LNs <20 | LNs ≥20 | P value | LNs <20 | LNs ≥20 | P value |
| Nervous system | 3.48 | 0.97 | 0.195 | 3.48 | 0.97 | 0.195 | 0.00 | 0.00 | - |
| Circulatory system | 2.00 | 1.94 | 0.977 | 1.00 | 0.97 | 0.984 | 1.00 | 0.97 | 0.984 |
| Ileus | 19.90 | 11.65 | 0.071 | 13.43 | 6.80 | 0.082 | 6.47 | 4.85 | 0.573 |
| Intestinal anastomosis failure | 2.49 | 1.94 | 0.764 | 0.00 | 0.00 | - | 2.49 | 1.94 | 0.764 |
| Ureteral stricture | 0.00 | 1.94 | 0.048* | 0.00 | 0.00 | - | 0.00 | 1.94 | 0.048* |
| Ureteral anastomosis failure | 0.50 | 1.94 | 0.228 | 0.00 | 0.00 | - | 0.50 | 1.94 | 0.228 |
| Lymphocele | 21.39 | 15.53 | 0.222 | 17.41 | 15.53 | 0.678 | 4.98 | 0.00 | 0.021* |
| Body cavity infection | 0.00 | 0.00 | - | 0.00 | 0.00 | - | 0.00 | 0.00 | - |
| Wound infection | 9.95 | 3.88 | 0.063 | 5.97 | 2.91 | 0.244 | 5.47 | 0.97 | 0.056 |
| Compartment syndrome | 0.50 | 0.00 | 0.473 | 0.50 | 0.00 | 0.473 | 0.00 | 0.00 | - |
| Others | 3.48 | 4.85 | 0.561 | 2.99 | 0.97 | 0.268 | 0.50 | 3.88 | 0.028* |

**Supplemental Table S1. Details of postoperative complications (n = 304)**

**LN: lymph node**
