# Supplementary material for: The number of dissected lymph nodes contributes to good prognosis after robot-assisted radical cystectomy for muscle-invasive bladder cancer without lymph node metastasis at clinical staging
Source: Research Square preprint supplement (doi:10.21203/rs.3.rs-8551382/v1), 2026-01-29
Supplement: Supplementary file 2 [file 691004c97fac2c835839ad37.docx]

**Supplemental Table S3. Related factors with RFS, CSS, and OS in univariate analysis (cN1–N3M0, n = 38)**

|  | | **RFS** | | **CSS** | | **OS** | |
| --- | --- | --- | --- | --- | --- | --- | --- |
| Hazard ratio (95% CI) | P value | Hazard ratio (95% CI) | P value | Hazard ratio (95% CI) | P value |
| Sex | Male vs Female | 2.396 (0.799-7.186) | 0.734 | 1.280 (0.418- 3.916) | 0.665 | 1.357 (0.447- 4.117) | 0.590 |
| PS | ≤1 vs ≥2 | 0.443 (0.184-0.473) | 0.153 | 0.549 (0.156- 1.934) | 0.351 | 0.598 (0.171- 2.085) | 0.419 |
| BMI (Continuous) | | 0.959 (0.829-1.106) | 0.570 | 0.968 (0.834- 1.123) | 0.673 | 0.967 (0.836- 1.116) | 0.646 |
| NAC | No vs Yes | 2.470 (0.965-6.321) | 0.059 | 4.677 (1.608-13.602) | 0.005* | 4.041 (1.441-11.337) | 0.008* |
| FAN score | ≤1 vs ≥2 | 0.095 (0.027-0.336) | <0.001* | 0.296 (0.095- 0.923) | 0.036* | 0.323 (0.105- 0.997) | 0.049* |
| Number of dissected LNs (Continuous) | | 0.996 (0.964-1.025) | 0.814 | 0.993 (0.958- 1.025) | 0.705 | 0.995 (0.961- 1.026) | 0.774 |

**RFS: recurrence-free survival; CSS: cancer-specific survival; OS: overall survival; PS: performance status; BMI: body mass index; NAC: neoadjuvant chemotherapy; LN: lymph node; FAN, fibrosis-4 index, albumin–bilirubin score, and neutrophil–lymphocyte ratio**
