# Supplementary material for: The number of dissected lymph nodes contributes to good prognosis after robot-assisted radical cystectomy for muscle-invasive bladder cancer without lymph node metastasis at clinical staging
Source: Research Square preprint supplement (doi:10.21203/rs.3.rs-8551382/v1), 2026-01-29
Supplement: Supplementary file 3 [file ada7b308a90823b2be70ced7.docx]

**Supplemental Table S2. Comparison of data between groups divided by number of dissected LNs**

|  | | **LNs <20** | **LNs ≥20** | **P value** |
| --- | --- | --- | --- | --- |
| Age (years) median (range) | | 75 (45-89) | 71 (47-88) | 0.021* |
| Sex  n (%) | Male | 149 (74.1) | 76 (73.8) | 0.949 |
| Female | 52 (25.9) | 27 (26.2) |
| ECOG PS  n (%) | ≤ 1 | 168 (83.6) | 95 (92.2) | 0.045* |
| ≥ 2 | 32 (15.9) | 8 ( 7.8) |
| Unknown | 1 ( 0.5) | 0 ( 0.0) |
| BMI (kg/m2) median (range) | | 21.9 (14.5-29.7) | 21.6 (16.2-30.4) | 0.263 |
| Past history of RNU  n (%) | Yes | 4 ( 2.0) | 4 ( 3.9) | 0.329 |
| No | 197 (98.0) | 99 (96.1) |
| Clinical T stage  n (%) | cT2 | 138 (68.7) | 56 (54.4) | 0.014* |
| ≥ cT3 | 63 (31.3) | 47 (45.6) |
| NAC  n (%) | Yes | 124 (61.7) | 71 (68.9) | 0.213 |
| No | 77 (38.3) | 32 (31.1) |
| eGFR (mL/min/1.73m2) median (range) | | 55.8 (3.4-116.5) | 55.5 (4.2-176.7) | 0.933 |
| Platelet (104/L) median (range) | | 23.0 (4.3-59.7) | 23.4 (6.3-76.8) | 0.724 |
| NLR median (range) | | 2.608 (0.724-18.300) | 2.650 (0.951-16.566) | 0.964 |
| MLR median (range) | | 0.322 (0.039- 8.000) | 0.312 (0.000-1.000) | 0.345 |
| Albumin (g/dL) median (range) | | 3.8 (1.9-4.6) | 3.8 (2.5-4.6) | 0.837 |
| AST (U/L) median (range) | | 19 (6-124) | 19 (8-70) | 0.622 |
| ALT (U/L) median (range) | | 13 (3-115) | 14 (4-86) | 0.683 |
| T-bil (mg/dL) median (range) | | 0.5 (0.1-2.1) | 0.5 (0.1-1.3) | 0.807 |
| Urinary diversion  n (%) | Ileal conduit | 149 (74.1) | 80 (77.7) | 0.149 |
| Neobladder | 8 ( 4.0) | 9 ( 8.7) |
| Ureterocutaneous fistula | 38 (18.9) | 12 (11.7) |
| No | 6 ( 3.0) | 2 ( 1.9) |
| Simultaneous nephroureterectomy  n (%) | Yes | 12 ( 6.0) | 6 ( 5.8) | 0.960 |
| No | 189 (94.0) | 97 (94.2) |
| Blood transfusion in hospital stay  n (%) | Yes | 78 (38.8) | 38 (36.9) | 0.946 |
| No | 117 (58.2) | 58 (56.3) |
| Unknown | 6 ( 3.0) | 7 ( 6.8) |
| Postoperative hospital stay (day) median (range) | | 23 (8-164) | 21 (10-57) | 0.611 |
| Discharge within 30 days  n (%) | Yes | 164 (81.6) | 85 (82.5) | 0.842 |
| No | 37 (18.4) | 18 (17.5) |
| Adjuvant therapy  n (%) | Chemotherapy | 16 ( 8.0) | 9 ( 8.7) | 0.112 |
| Nivolumab | 11 ( 5.4) | 14 (13.6) |
| No | 172 (85.6) | 75 (72.8) |
| Unknown | 2 ( 1.0) | 5 ( 4.9) |

**LN: lymph node; BMI: body mass index; ECOG: Eastern Cooperative Oncology Group; PS: performance status; RNU: radical nephroureterectomy; NAC: neoadjuvant chemotherapy; eGFR: estimated glomerular filtration rate; NLR: neutrophil–lymphocyte ratio; MLR: monocyte–lymphocyte ratio; AST: aspartate aminotransferase; ALT: alanine aminotransferase; T-bil: total bilirubin**
